# Supplementary material
Source: PubMed Central journal article supplement (PMC3796345)

## Supplemental Figure 1

Scatter plot and Pearson correlation coefficients between key fatty acid intake variables (n=2,178). *Abbreviations:* AA=Arachidonic acid; ALA= $\alpha$ -linolenic acid; DHA=Docosahexaenoic acid; DPA=Docosapentaenoic acid EPA=Eicosapentaenoic acid; LA=Linoleic acid; *n3*=omega-3; *n6*=omega-6. \*p<0.0001 for null hypothesis that r=0.

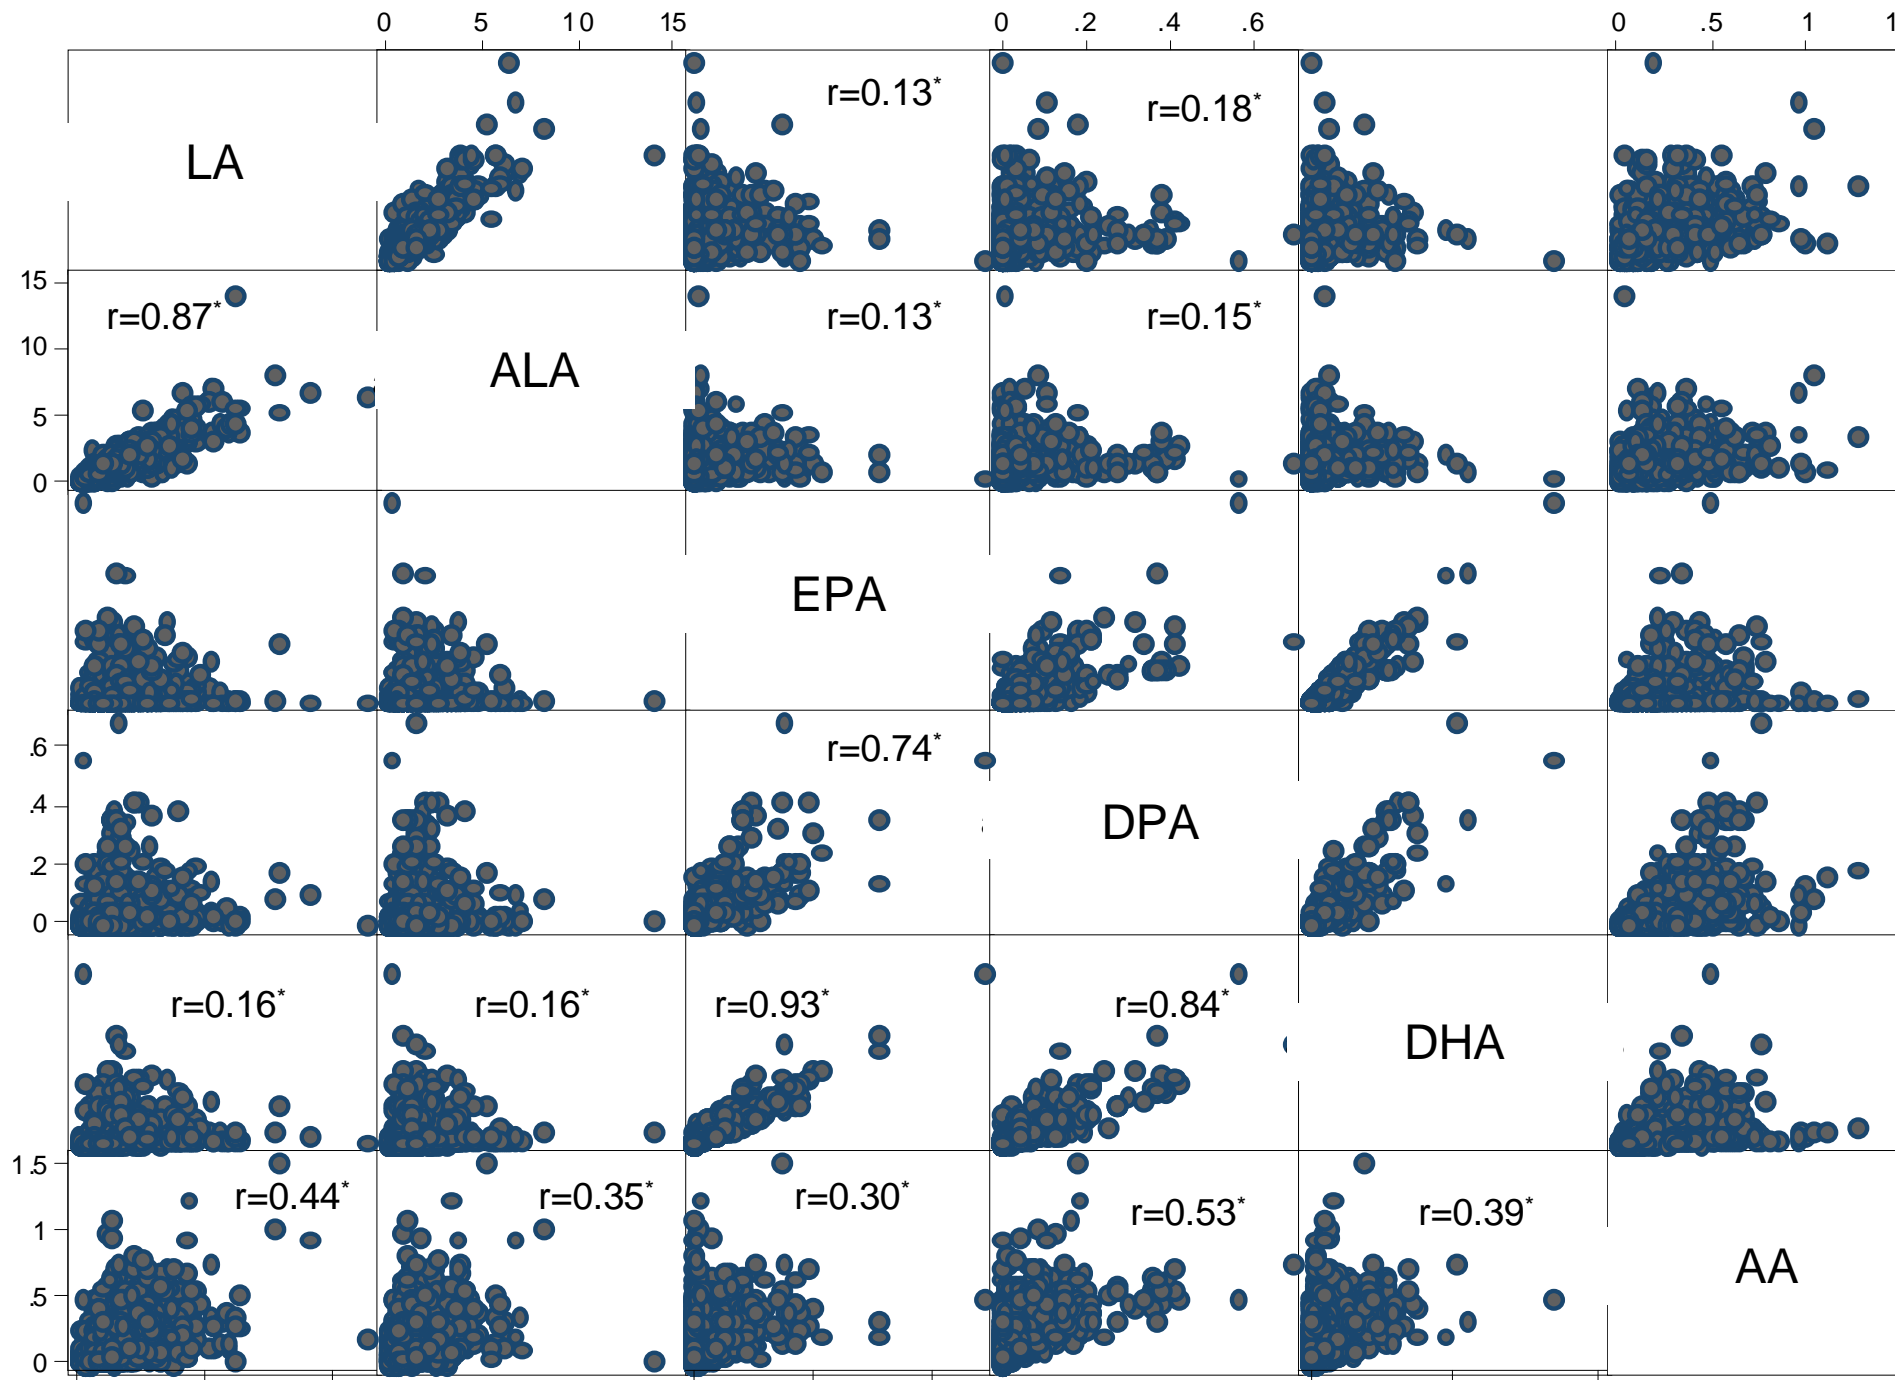

Supplement: jn.113.179119_nutrition179119SupplementaryData2.pdf [file jn.113.179119_nutrition179119SupplementaryData2.pdf]
